# Supplementary material
Source: PubMed Central journal article supplement (PMC2794423)
Supplement: NIHMS161619-supplement-SupplementaryMaterials.pdf [file NIHMS161619-supplement-SupplementaryMaterials.pdf]

**Supplementary Table 1.** Proteins observed primarily within the outer membrane after performing Z-score analysis and clustering on proteins detected in multiple sub-cellular fractions. These proteins were observed in both *Rhodobacter sphaeroides* aerobic and photosynthetic cell cultures.

| ORF ID  | Percent Coverage | Unique Peptides | Protein Residue Count | Description                                                   |
|---------|------------------|-----------------|-----------------------|---------------------------------------------------------------|
| RSP0007 | 31               | 6               | 374                   | Putative outer membrane protein                               |
| RSP0243 | 43               | 18              | 342                   | Putative lipoprotein                                          |
| RSP0759 | 50               | 12              | 378                   | Putative capsule polysaccharide exporter                      |
| RSP0837 | 36               | 6               | 231                   | Hypothetical                                                  |
| RSP0839 | 22               | 3               | 162                   | Predicted secreted periplasmic protein                        |
| RSP0841 | 39               | 9               | 206                   | Hypothetical protein                                          |
| RSP0842 | 41               | 18              | 330                   | Putative porin                                                |
| RSP0891 | 69               | 13              | 262                   | Putative lipoprotein                                          |
| RSP1182 | 27               | 10              | 607                   | Putative outer membrane protein                               |
| RSP1187 | 49               | 25              | 722                   | Hypothetical protein                                          |
| RSP1200 | 68               | 8               | 184                   | Putative membrane protein with putative signal leader peptide |
| RSP1754 | 53               | 12              | 269                   | Conserved hypothetical                                        |
| RSP1812 | 44               | 10              | 391                   | Conserved hypothetical protein                                |
| RSP1880 | 34               | 12              | 519                   | Hypothetical protein                                          |
| RSP1972 | 49               | 4               | 150                   | Hypothetical protein                                          |
| RSP2117 | 49               | 11              | 278                   | Putative ComL lipoprotein.                                    |
| RSP2402 | 44               | 21              | 611                   | Putative TonB dependent Vitamin B12 outer membrane receptor   |
| RSP2507 | 16               | 3               | 203                   | Outer membrane protein                                        |
| RSP2616 | 52               | 7               | 165                   | Conserved hypothetical protein                                |
| RSP2698 | 64               | 19              | 448                   | Putative bacterial quinoprotein                               |
| RSP2711 | 50               | 32              | 799                   | Putative outer membrane protein                               |
| RSP2718 | 62               | 6               | 200                   | Possible outer membrane protein                               |
| RSP2812 | 50               | 5               | 201                   | Conserved hypothetical protein                                |
| RSP2847 | 42               | 5               | 189                   | Conserved hypothetical protein                                |
| RSP3349 | 66               | 12              | 292                   | Hypothetical                                                  |
| RSP3669 | 19               | 14              | 1175                  | Conserved hypothetical protein                                |
| RSP3768 | 22               | 2               | 120                   | Hypothetical                                                  |
| RSP6001 | 47               | 3               | 90                    | Hypothetical                                                  |
| RSP6008 | 18               | 4               | 315                   | Hypothetical protein                                          |
| RSP6151 | 46               | 5               | 133                   | Hypothetical                                                  |
